# Supplementary material
Source: PubMed Central journal article supplement (PMC2746794)

**A stimulate in feedback pathway  
(Uva → HVC<sub>1</sub> connections intact)**

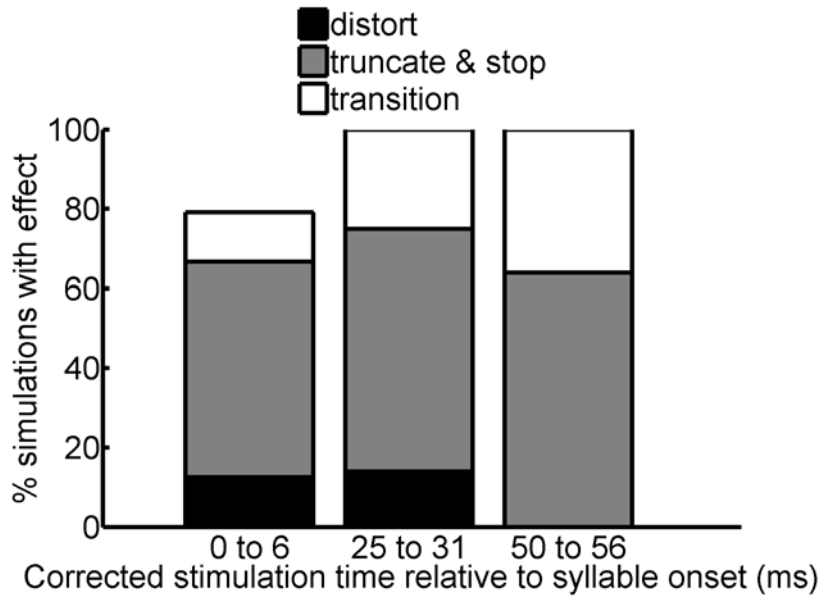

**B stimulate in feedback pathway  
(no Uva → HVC<sub>1</sub> connections)**

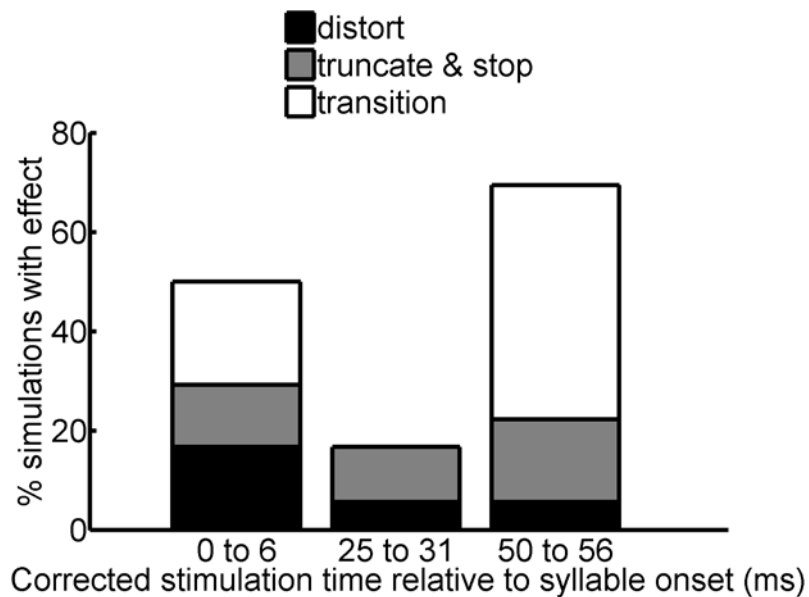

Supplement: 91154.2008_3.pdf [file 91154.2008_3.pdf]
