# Supplementary material
Source: PubMed Central journal article supplement (PMC2746794)

FIG. S1

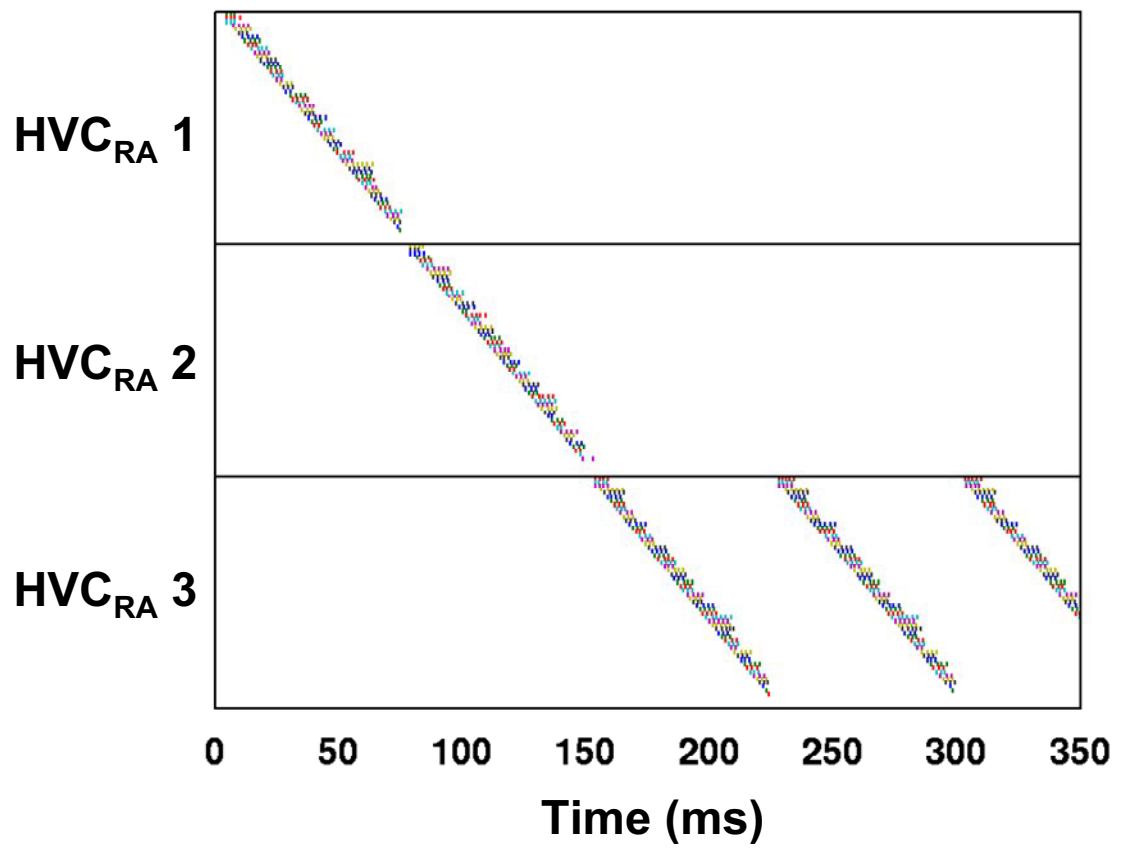

Supplement: 91154.2008_1.pdf [file 91154.2008_1.pdf]

FIG. S2

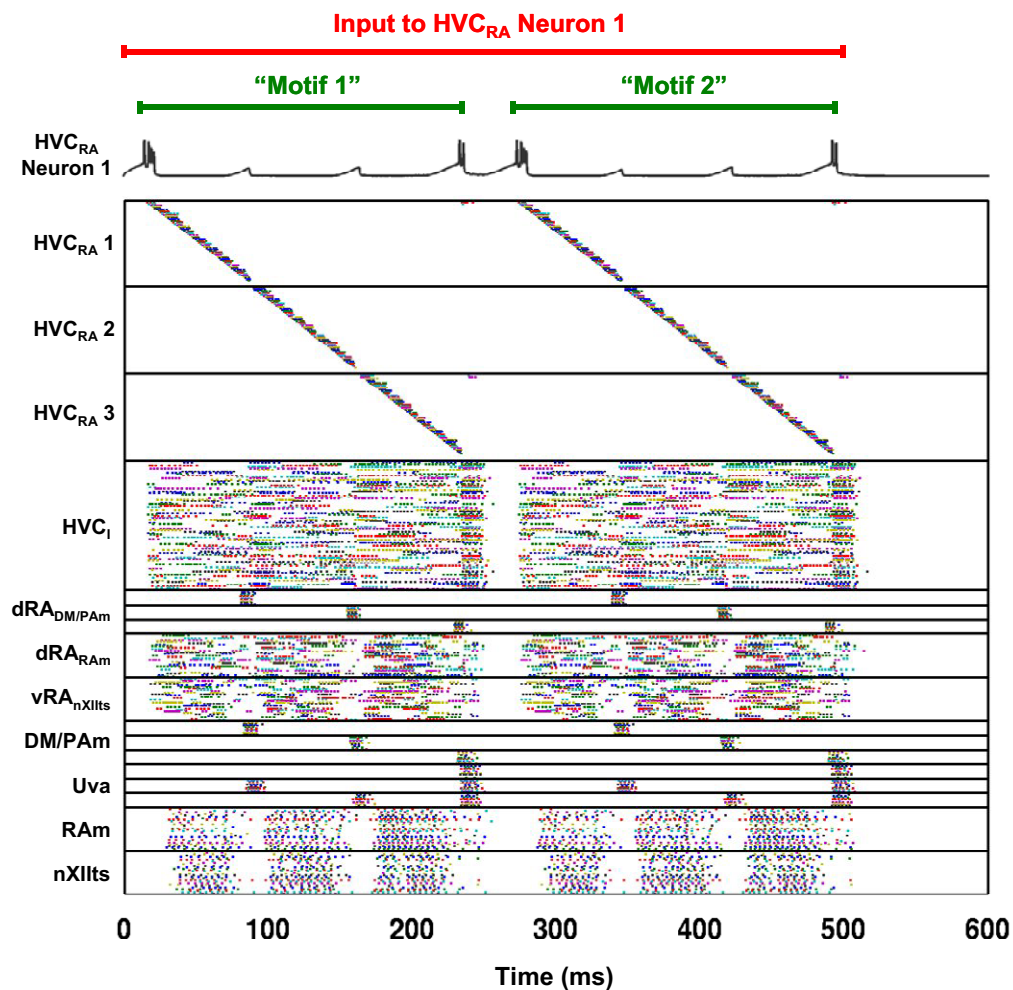

Supplement: 91154.2008_2.pdf [file 91154.2008_2.pdf]

**A normal**

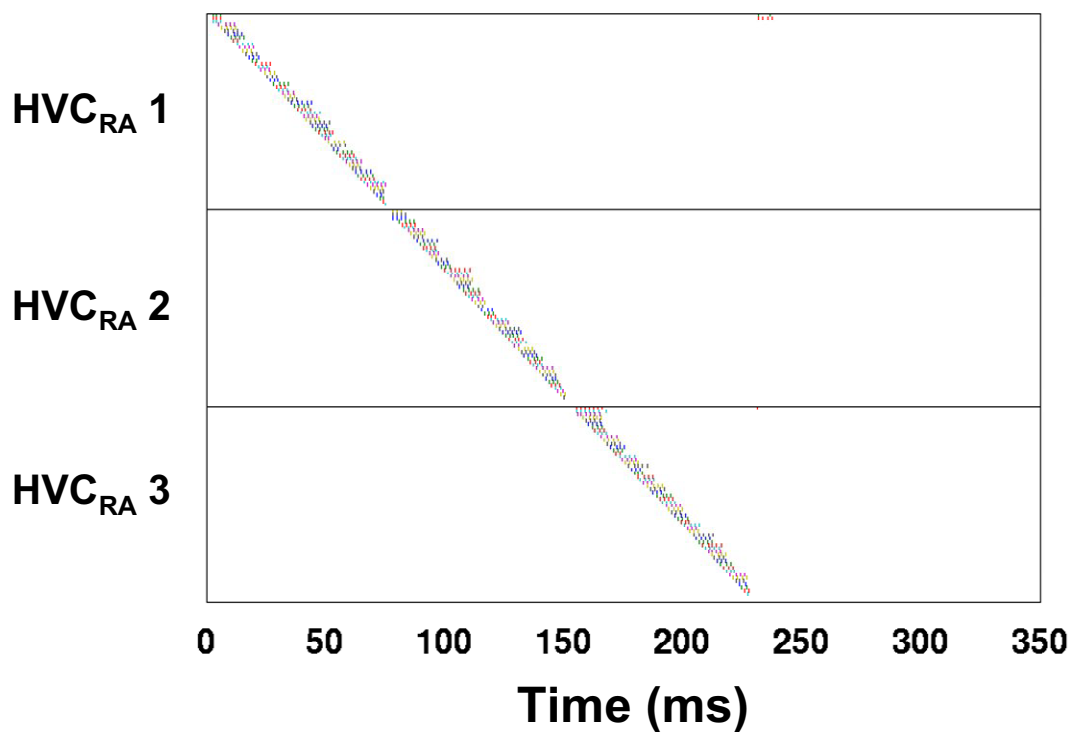

**B HVC slowed**

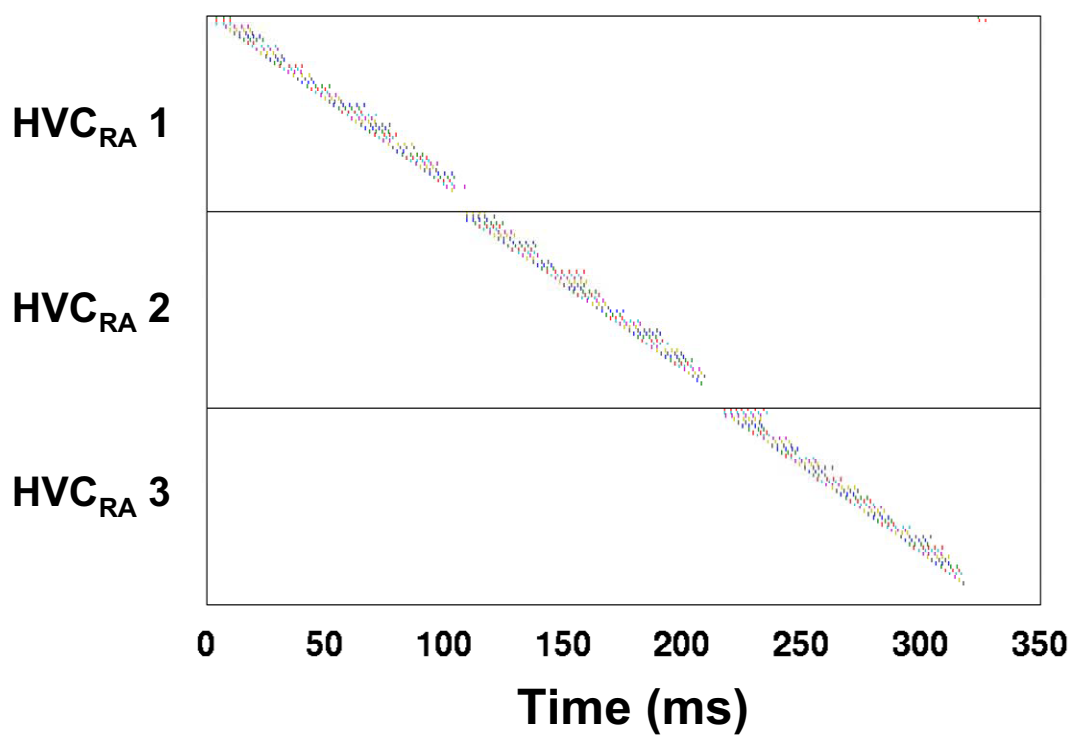

Supplement: 91154.2008_4.pdf [file 91154.2008_4.pdf]
